# Supplementary material
Source: publisher figshare collection journal article supplement (https://gsapubs.figshare.com/ndownloader/files/23304008)
Supplement: Supplementary file 1 [file 23304008]

## Sheet: Orthopyroxene
Selected analyses of orthopyroxene (Opx)
Sample	Location		Host lithology	Massif	Major elements composition (wt.%)												Wo (Ca)	En (Mg)	Fs (Fe2+)	XMgFeT	Mg#
number	Lat (°N)	Long (°W)			SiO2	TiO2	Al2O3	Cr2O3	FeO	MnO	MgO	CaO	Na2O	K2O	NiO	Total
Interstitial Opx in dunites
14OM108	57.9337	23.1428	Impregnated dunite	Sumail	57.177	0.322	1.598	0.541	5.793	0.181	32.799	1.235	0.035	0	0.052	99.733	2.40196	88.801	8.79709	0.909864	90.9864
15OM02A	57.9333	23.1431	Impregnated dunite	Sumail	56.807	0.221	1.901	0.617	6.175	0.151	31.906	1.968	0.045	0.004	0.067	99.926	3.84342	86.7406	9.41598	0.902077	90.2077
15OM58	57.9533	23.1181	Impregnated dunite	Sumail	56.236	0.26	2.019	0.691	6.83	0.185	32.474	1.135	0.012	0.018	0.045	99.956	2.19648	87.4833	10.3202	0.89448	89.448
16OM67	57.9387	23.1384	Impregnated dunite	Sumail	57.235	0.211	1.726	0.558	5.989	0.206	34.197	1.639	0.004	0.03	0.099	101.893	3.03972	88.2878	8.67252	0.910556	91.0556
16OM133	57.9442	23.1226	Impregnated dunite	Sumail	56.725	0.235	1.696	0.554	5.691	0.147	32.999	1.606	0.021	0.011	0.122	99.834	3.08929	88.3632	8.54747	0.911801	91.1801
Inclusions of Opx in chromites
15OM05*	57.9336	23.1429	Impregnated dunite	Sumail	58.828	0.123	0.33	0.788	5.901	0.168	35.592	0.322	0.008	0.021	0.052	102.152	0.59109	90.9511	8.45784	0.914919	91.4919
15OM55	57.9531	23.1175	Impregnated dunite	Sumail	57.001	0.246	1.62	0.469	6.015	0.189	33.593	1.089	0	0.002	0.134	100.417	2.07235	88.9903	8.93733	0.908735	90.8735
15OM104	57.9469	23.1117	Impregnated dunite	Sumail	57.946	0.299	0.825	0.776	6.124	0.178	34.036	0.319	0.016	0	0.053	100.633	0.607842	90.281	9.11111	0.908332	90.8332
16OM139	57.9393	23.1356	Pure dunite	Sumail	56.89	0.18	0.75	0.64	5.75	0.28	34.72	0.56	0.1	0	0.05	99.92	1.04905	90.5407	8.41027	0.915006	91.5006
16OM173	57.9378	23.1439	Impregnated dunite	Sumail	57.946	0.15	0.519	0.924	7.631	0.22	33.569	0.26	0.022	0	0.044	101.375	0.491045	88.256	11.2529	0.886915	88.6915
* Opx inclusion of the figure 3F
Porphyroclastic Opx in harzburgites
15OM22	57.952	23.1409	Harzburgite	Sumail	56.762	0.003	1.884	0.652	5.922	0.186	33.508	1.482	0.007	0	0.116	100.523	2.80943	88.4251	8.76544	0.909812	90.9812
15OM163	57.9492	23.1291	Harzburgite	Sumail	56.657	0	1.7097	0.6514	6.1672	0.1392	33.189	1.449	0.0021	0.0027	0.0702	100.037	2.76182	88.0601	9.17807	0.905612	90.5612
16OM188	57.928	23.1219	Harzburgite	Sumail	56.949	0	1.78	0.579	5.784	0.161	33.122	1.199	0.011	0.013	0.046	99.709	2.31365	88.9718	8.7145	0.910791	91.0791
16OM189	57.9262	23.132	Harzburgite	Sumail	56.693	0.005	1.931	0.529	5.724	0.135	33.687	0.957	0	0.027	0.09	99.844	1.82911	89.6288	8.54207	0.912988	91.2988
16OM196B	57.934	23.152	Harzburgite	Sumail	57.433	0	1.352	0.689	5.587	0.08	33.561	1.127	0.038	0.02	0.086	99.974	2.15866	89.4858	8.35557	0.914601	91.4601

## Sheet: Igneous clinopyroxene
Selected analyses of clinopyroxene (Cpx)
Sample	Location		Host lithology	Massif	Major elements composition (wt.%)												Wo (Ca)	En (Mg)	Fs (Fe2+)	XMgFeT	#Mg
number	Lat (°N)	Long (°W)			SiO2	TiO2	Al2O3	Cr2O3	FeO	MnO	MgO	CaO	Na2O	K2O	NiO	Total
Interstitial Cpx in dunites
14 OM 110A	57.9333	23.143	Impregnated dunite	Sumail	52.266	0.47	3.13	1.122	2.425	0.079	15.274	24.664	0.46	0	0.08	99.97	51.577	44.4635	3.9595	0.918231	91.8231
15OM33	57.942	23.1359	Impregnated dunite	Sumail	52.426	0.155	2.9	1.27	2.915	0.092	18.732	20.793	0.415	0.016	0.018	99.775	42.3094	53.0594	4.63121	0.919723	91.9723
15OM110B	57.9483	23.1119	Impregnated dunite	Sumail	51.421	0.748	3.377	1.325	2.136	0.025	15.551	24.393	0.567	0.003	0.023	99.568	51.129	45.3752	3.49575	0.92847	92.847
15OM150A	57.9488	23.1292	Impregnated dunite	Sumail	51.834	0.2376	3.4175	1.3929	2.5387	0.1169	16.787	23.9131	0.1742	0.0031	0.0369	100.461	48.5409	47.4354	4.02364	0.921809	92.1809
15OM192	57.9388	23.1179	Impregnated dunite	Sumail	51.59	0.44	3.38	1.36	2.44	0.06	15.95	23.45	0.67	0	0.02	99.35	49.3077	46.6864	4.00588	0.920977	92.0977
Inclusions of Cpx in chromites
15OM05*	57.9336	23.1429	Impregnated dunite	Sumail	54.091	0.484	1.647	1.187	2.433	0.102	17.299	24.06	0.391	0.022	0	101.792	48.0807	48.1231	3.79623	0.926882	92.6882
16OM122	57.9463	23.1239	Pure dunite	Sumail	53.01	0.41	2.31	1.45	1.76	0.09	16.04	23.9	1.1	0.01	0.04	100.13	50.2071	46.9061	2.8868	0.942024	94.2024
16OM124**	57.9458	23.1237	Pure dunite	Sumail	55.276	0.174	1.387	1.474	1.717	0.031	17.082	23.954	0.961	0.02	0	102.164	48.8122	48.4559	2.73185	0.946631	94.6631
16OM132	57.9445	23.1229	Impregnated dunite	Sumail	53.662	0.552	2.215	1.519	2.564	0.063	16.368	22.112	0.934	0.01	0.014	100.014	47.1479	48.5834	4.26863	0.919234	91.9234
16OM187	57.9361	23.1481	Pure dunite	Sumail	53.469	0.412	2.363	1.625	2.089	0	16.009	24.811	0.515	0.002	0	101.3	50.9178	45.7349	3.34734	0.931801	93.1801
* Cpx inclusion of the figure 3F
** Cpx inclusion of the figure 3E

## Sheet: Hybrid diopside
Selected analyses of hybrid diopside
Sample	Location		Host lithology	Massif	Major elements composition (wt.%)												Wo (Ca)	En (Mg)	Fs (Fe2+)	XMgFeT	Mg#
number	Lat (°N)	Long (°W)			SiO2	TiO2	Al2O3	Cr2O3	FeO	MnO	MgO	CaO	Na2O	K2O	NiO	Total
Interstitial hybrid diopside in dunites
14 OM 82	57.8973	23.0987	Impregnated dunite	Sumail	54.846	0.139	0.596	0.18	1.579	0.078	17.609	25.433	0.036	0	0.063	100.56	49.6946	47.8965	2.40896	0.952113	95.2113
14 OM 109A	57.9334	23.1431	Pure dunite	Sumail	55.983	0.017	0.015	0.002	0.746	0	17.704	26.221	0	0	0.086	100.773	50.9655	47.9023	1.13215	0.976911	97.6911
15OM33	57.942	23.1359	Impregnated dunite	Sumail	55.211	0.001	0.143	0.152	1.759	0	17.323	26.291	0.038	0	0.055	100.973	50.7753	46.5722	2.65245	0.946115	94.6115
16OM47	57.9352	23.1368	Pure dunite	Sumail	55.33	0.022	0.453	0.184	0.802	0	17.518	26.073	0.016	0.004	0.003	100.404	51.0382	47.736	1.22579	0.974964	97.4964
16OM192	57.9361	23.1484	Pure dunite	Sumail	55.934	0.018	0	0.02	0.624	0.003	18.039	26.29	0.016	0	0.01	100.954	50.6663	48.3948	0.938964	0.980967	98.0967
Inclusions of hybrid diopside in chromites
15OM04B	57.9333	23.1431	Impregnated dunite	Sumail	55.225	0.208	0.825	0.794	1.791	0.069	17.52	24.547	0.241	0	0.034	101.279	48.768	48.4538	2.77823	0.945772	94.5772
15OM152A	57.9469	23.1287	Pure dunite	Sumail	53.8455	0.2025	0.7223	0.2726	1.2144	0.0448	18.0453	26.5418	0	0	0.067	101.091	50.4617	47.7361	1.80215	0.963627	96.3627
15OM191	57.9392	23.1189	Pure dunite	Sumail	54.14	0.24	0.58	0.25	1.23	0	17.56	26.16	0	0	0	100.16	50.7321	47.4054	1.86246	0.962197	96.2197
16OM124*	57.9458	23.1237	Pure dunite	Sumail	54.96	0.29	0.945	1.095	1.398	0.051	16.981	24.322	0.726	0.01	0.004	100.788	49.584	48.1907	2.22528	0.955862	95.5862
16OM173	57.9378	23.1439	Impregnated dunite	Sumail	54.739	0.222	0.866	0.231	1.801	0.04	17.238	24.806	0.086	0	0	100.06	49.4059	47.7933	2.80074	0.944643	94.4643
* Hybrid diopside inclusion of the figure 3E

## Sheet: Amphibole
Selected analyses of amphibole
Sample	Location		Host lithology	Massif	Major elements composition (wt.%)
number	Lat (°N)	Long (°W)			SiO2	TiO2	Al2O3	Cr2O3	FeO	MnO	MgO	CaO	Na2O	K2O	NiO	Total
Interstitial amphibole in dunites
14 OM 39A	57.9371	23.0577	Impregnated dunite	Sumail	43.4839	0.9435	15.2515	0.5645	3.4812	0.0945	17.9428	13.1811	2.6997	0.0522	0.1329	97.828
14 OM 111A	57.933	23.1431	Impregnated dunite	Sumail	47.334	0.053	12.808	0.067	3.753	0.036	18.537	13.178	2.393	0.045	0.113	98.316
15OM56	57.9532	23.1178	Impregnated dunite	Sumail	44.588	2.57	10.663	2.409	3.568	0.077	17.472	11.946	2.766	0.233	0.148	96.448
15OM174	57.9429	23.1225	Impregnated dunite	Sumail	44.221	1.2386	12.3175	1.729	4.8965	0.0337	17.9544	12.0473	2.9163	0.1129	0	97.4672
16OM135	57.9439	23.1224	Impregnated dunite	Sumail	45.265	1.737	10.405	1.688	4.072	0.065	17.561	12.612	2.488	0.021	0.061	96.025
Inclusions of Opx in chromites
15OM05*	57.9336	23.1429	Impregnated dunite	Sumail	43.971	3.421	11.647	2.578	3.939	0.049	18.062	12.17	3.29	0.241	0.056	99.422
15OM32	57.9424	23.1359	Pure dunite	Sumail	44.281	1.049	11.456	2.384	4.09	0.012	17.827	12.916	3.333	0.211	0.096	97.68
15OM159	57.9437	23.1274	Pure dunite	Sumail	42.24	1.54	13.1	2.72	4.02	0	17.71	12.69	4.03	0.15	0.12	98.33
15OM181	57.9413	23.1227	Impregnated dunite	Sumail	42.16	1.07	13.75	2.33	3.53	0.04	18.11	12.83	4.04	0.11	0.04	98.02
16OM200B	57.9335	23.1608	Impregnated dunite	Sumail	45.636	2.602	10.507	2.429	3.016	0.077	18.788	11.834	2.577	0.041	0.108	97.664
* Amphibole inclusion of the figure 3F

## Sheet: Garnet
Selected analyses of garnet
Sample	Location		Host lithology	Massif	Major elements composition (wt.%)
number	Lat (°N)	Long (°W)			SiO2	TiO2	Al2O3	Cr2O3	FeO	MnO	MgO	CaO	Na2O	K2O	NiO	Total
Interstitial grossular in dunites
14OM50B	57.9342	23.0587	Impregnated dunite	Sumail	38.1035	0.0287	22.1928	0	1.1164	0.1071	0.0573	37.4814	0	0		99.0873
15OM02B1	57.9333	23.1431	Impregnated dunite	Sumail	38.3415	0.0179	22.7601	0	0.7793	0.276	0.0321	37.8252	0	0.0051	0.0059	100.043
15OM107	57.9478	23.1117	Impregnated dunite	Sumail	39.414	0.013	22.85	0	0.509	0.236	0	37.582	0.018	0		100.691
15OM177	57.9424	23.1225	Impregnated dunite	Sumail	37.9751	0.0664	21.2625	0	2.3025	0.0665	0.1074	38.0262	0	0	0	99.8514
16OM134	57.9441	23.1225	Impregnated dunite	Sumail	38.35	0	22.37	0	0.81	0.36	0.09	37.17	0.01	0	0	99.17
Interstitial andradite in dunites
15OM02D	57.9333	23.1431	Impregnated dunite	Sumail	35.93	0.1555	3.2084	0	24.3327	0.0725	0.1115	34.2194	0	0.0059	0	98.0595
15OM149	57.9495	23.1278	Impregnated dunite	Sumail	35.5074	0.0392	0.3584	0.0035	27.5798	0	0.1016	33.3419	0	0	0	96.9318
16OM145	57.9402	23.1356	Impregnated dunite	Sumail	34.87	0.03	3.02	0	24.12	0	0.11	33.71	0	0	0.01	95.98
Inclusions of grossular in chromites
15OM05	57.9336	23.1429	Impregnated dunite	Sumail	37.9423	0.0193	22.5976	0	0.8908	0.0746	0.0449	38.3291	0	0	0	99.8988
16OM75B	57.9341	23.1366	Impregnated dunite	Sumail	37.84	0	20.331	0.012	2.823	0.27	0.071	37.531	0.01	0.028	0.003	98.918
16OM124*	57.9458	23.1237	Pure dunite	Sumail	37.895	2.867	15.578	5.129	2.088	0.164	0.147	35.871	0	0	0	99.757
16OM124*	57.9458	23.1237	Pure dunite	Sumail	36.822	0.844	15.34	2.938	2.085	0.018	2.934	36.127	0	0.008	0.061	97.223
16OM138	57.9392	23.1357	Pure dunite	Sumail	36.639	2.453	13.779	3.343	2.78	0	2.84	35.409	0.068	0.011	0.017	97.362
* Opx inclusion of the figure 3E

## Sheet: Mica
Selected analyses of mica
Sample	Location		Host lithology	Massif	Major elements composition (wt.%)
number	Lat (°N)	Long (°W)			SiO2	TiO2	Al2O3	Cr2O3	FeO	MnO	MgO	CaO	Na2O	K2O	NiO	Total
Inclusions of aspidolite (Na-rich mica) in chromites
15OM104	57.9469	23.1117	Impregnated dunite	Sumail	38.891	6.038	15.794	2.345	3.658	0.071	21.53	0.58	5.33	1.333	0.16	95.745
15OM110B	57.9483	23.1119	Impregnated dunite	Sumail	39.557	6.3	15.986	1.804	2.828	0.013	23.266	0.14	7.723	0.206	0.214	98.102
16OM138	57.9392	23.1357	Pure dunite	Sumail	40.31	3.68	15.86	2.46	2.39	0	24.96	0.02	8.1	0.41	0.11	98.31
16OM181	57.9368	23.1452	Impregnated dunite	Sumail	39.902	6.637	14.585	2.289	2.97	0.019	22.128	0.056	6.359	0.109	0.14	95.275
16OM193A	57.9357	23.1488	Impregnated dunite	Sumail	40.024	2.069	17.01	2.056	2.142	0	23.919	0.939	4.809	1.131	0.094	94.267
Inclusions of phlogopite (K-rich mica) in chromites
15OM110B	57.9483	23.1119	Impregnated dunite	Sumail	38.243	5.37	15.08	1.942	3.749	0.068	21.385	0.099	0.468	9.123	0.141	95.666
15OM111A	57.9488	23.1122	Impregnated dunite	Sumail	38.975	2.652	13.367	1.471	4.83	0.064	23.732	0.251	0.198	7.69	0.116	93.349
16OM128	57.945	23.1233	Impregnated dunite	Sumail	38.88	4.93	15.72	2.07	2.12	0.11	22.89	0.03	2.91	6.41	0.11	96.24
16OM138	57.9392	23.1357	Pure dunite	Sumail	39.06	3	15.08	3.42	2.29	0	23.83	0.03	2.23	7.57	0.14	96.69
16OM193A	57.9357	23.1488	Impregnated dunite	Sumail	37.194	2.154	16.784	2.289	2.611	0.067	23.775	0.541	1.736	6.635	0.174	93.998
